# Supplementary material for: A New AS-PCR Method to Detect CSN201 Allele, Genotyping at Ca-Sensitive Caseins Loci and Milk Traits Association Studies in Autochthonous Lazio Goats
Source: MDPI journal article supplement (doi:10.3390/ani13020239), 2023-01-09
Supplement: s1 [file s1]

**Table S1.** Primer sequences and position used for AS-PCR.

| <b>CSN2-<br/>Amplified<br/>Fragment</b>    | <b>Position</b>                    | <b>Primer Sequence (5'-3')</b> | <b>Primer<br/>Name</b> |
|--------------------------------------------|------------------------------------|--------------------------------|------------------------|
| Partial<br>intron 6 -<br>partial exon<br>7 | 8470-8495 *                        | F: AGGAGGATAATTCATCATGAATAACA  | CSN2                   |
|                                            | Complementary to<br>8914 - 8932 ** | R: CAGGCAGAACTTTGGGCT <u>A</u> | CSN201                 |
|                                            | Complementary to<br>8915- 8932 *   | R: AGGCAGAACTTTGGGCT <u>G</u>  | CSN2N                  |

\* Numbering of primers was according to the goat *CSN2* sequence (AJ011018.3)

\*\* Numbering of primer is according to the goat *CSN2* sequence (AJ011019.3)

**Table S2.** Comparison of the allele frequencies for the *CSN1S1* locus in different Italian goat breeds.

| Goat Breed          | <i>CSN1S1</i> |                |        |        |        |        | References   |
|---------------------|---------------|----------------|--------|--------|--------|--------|--------------|
|                     | F             | N              | B*     | A*     | E      | 01     |              |
| Capestrina          | 0.5700        | - <sup>1</sup> | 0.2600 | 0.170  | -      | -      | Present work |
| Bianca Monticellana | 0.4260        | 0.004          | 0.2800 | 0.2800 | -      | -      | Present work |
| Ciociara            | 0.3800        | -              | 0.3900 | 0.2400 | -      | -      | Present work |
| Napoletana          | 0.3680        | 0.227          | 0.1800 | 0.1420 | 0.0830 | -      | [2]          |
| Saanen              | 0.1400        | -              | 0.0600 | 0.3500 | 0.4300 | 0.0200 | [49]         |
| Camosciata Alpina   | 0.1100        | -              | 0.1500 | 0.5600 | 0.1800 | -      | [49]         |
| Girgentana          | 0.2900        | 0.047          | 0.0650 | 0.5900 | 0.008  | -      | [63]         |
| Sarda               | 0.2420        | 0.006          | 0.5200 | 0.2020 | 0.0300 | 0.0010 | [25]         |
| Argentata dell'Etna | 0.3690        | -              | 0.6310 |        | -      | -      | [41]         |
| Rossa Mediterranea  | 0.480         | -              | 0.5200 |        | -      | -      | [64]         |
| Vallesana           | 0.3860        | -              | 0.1270 | 0.0300 | 0.2830 | 0.1750 | [42]         |
| Roccaverano         | 0.3770        | 0.0190         | 0.1170 | 0.2270 | 0.2140 | 0.0450 | [42]         |
| Jonica              | 0.2820        | -              | 0.3050 | 0.3500 | 0.0640 | -      | [42]         |
| Garganica           | 0.2281        | 0.0088         | 0.2807 | 0.4298 | 0.0175 | 0.0351 | [56]         |
| Maltese             | 0.3710        | -              | 0.1570 | 0.4140 | 0.0570 | -      | [42]         |
| Frisa               | 0.5570        | -              | 0.0070 | 0.1290 | 0.2000 | 0.1070 | [46]         |
| Orobica             | 0.9620        | -              | 0.0080 | -      | 0.0080 | 0.0230 | [46]         |
| Verzasca            | 0.7540        | -              | 0.0370 | -      | 0.2010 | 0.0070 | [46]         |

<sup>1</sup>:- allele frequency = 0.

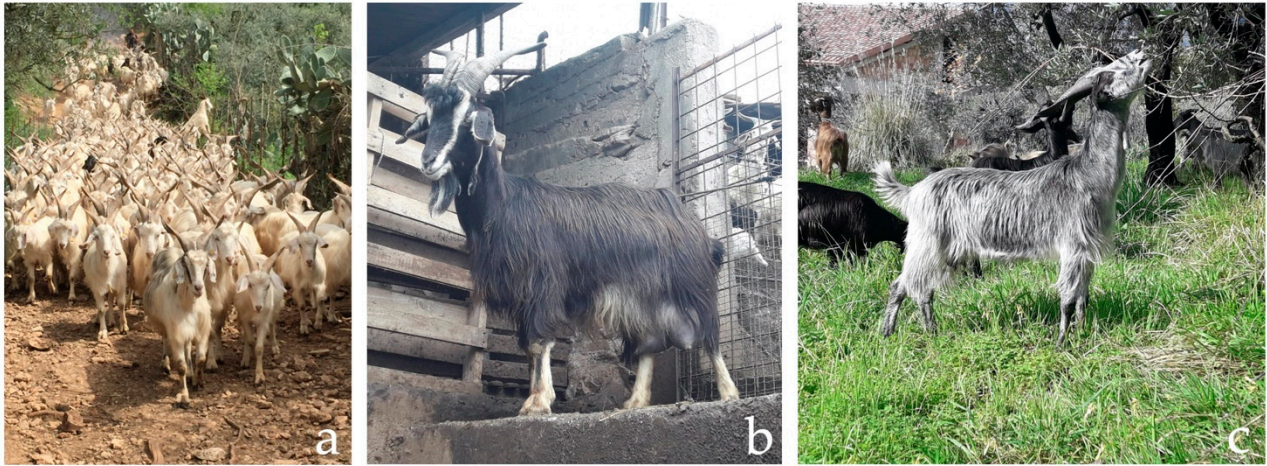

**Figure S1.** (a) flock of Bianca Monticellana goat breed that goes to pasture; (b) Capestrina goat at the recovery; (c) Ciociara Grigia goat breed at the pasture.

aggaggataattcatcatgaataacaattataactggattatggactcaaagatttttttcttctttccag

**D E L Q D K I H P F A Q A Q S L V Y P F T G P I P N S**  
GATGAACTCCAGGATAAAATCCACCCCTTTGCCCAGGCACAGTCTCTAGTCTATCCCTTCACTGGGCCCATCCCTAACAG

**L P Q N I L P L T Q T P V V V P P F L Q P E I M G V**  
CCTCCACAAAACATCCTGCCTCTTACTCAAACCCCTGTGGTGGTGCCGCCTTTCCTTCAGCCTGAAATAATGGGAGTCC

**P K V K E T M V P K H K E M P F P K Y P V E P F T E S**  
CCAAAGTGAAGGAGACTATGGTTCCTAAGCACAAAGAAATGCCCTTCCCTAAATATCCAGTTGAGCCCTTTACTGAAAGC

**Q S L T L T D V E K L H L P L P L V Q S W M H Q P P Q**  
CAGAGCCTGACTCTCACTGATGTTGAAAAGCTGCACCTTCTGCTCTGGTCCAGTCTTGGATGCACCAGCCTCCCCA

166

**P L S P T V M F P P Q S V L S L S Q P K V L P V P Q**  
GCCTCTTCTCCAACCGTCATGTTTCCTCCTCAGTCCGTGCTGTCCCTTTCTCAGCCCAAAGTTCTGCCTGTTCCTCCAGA

A T  
Y \*

**K A V P Q R D M P I Q A F L L Y Q E P V L G P V R G P**  
AAGCAGTGCCCCAGAGAGATATGCCCATCCAGGCCTTTCTGCTGTACCAGGAGCCTGTACTTGGTCCTGTCCGGGGACCC

**F P I L**  
TTCCCTATTCTTgtaagtctaaatttactaactgtgctgtttaacttctgatgtttgtatgatatttgagtaattaagag

ccctacaaaaaatcaataatgaatggttccaaaataagcatagctgagattaatgattctcagcattagttataaaataga

ataagctggaaaac

**Figure S2.** The goat CSN2 exon 7 nucleotide sequence (capital letters) plus the partial intron flanking region (small letters). Primer sequences for AS-PCR reported by Ramunno *et al.* (1995) are double underlined. Amino acid sequence is in uppercase and bold letters. Primer sequences for AS-PCR reported in this work are boxed. Transversion AJ011018.3:g.8913C>T responsible for the amino acid exchange p.Ser166>Tyr in the mature protein encoded by CSN2<sup>E</sup> allele is highlighted in gray. CSN2<sup>01</sup> premature stop codon is symbolized by \*.

## References

2. Cosenza, G.; Pauciullo, A.; Gallo, D.; Colimoro, L.; D'Avino, A.; Mancusi, A.; Ramunno, L. Genotyping at the CSN1S1 locus by PCR-RFLP and AS-PCR in a Neapolitan Goat Population. *Small Rumin. Res.* **2008**, *74*, 84–90. <https://doi.org/10.1016/j.smallrumres.2007.03.010>.
25. Vacca, G.M.; Dettori, M.L.; Piras, G.; Manca, F.; Paschino, P.; Pazzola, M. Goat casein genotypes are associated with milk production traits in the Sarda breed. *Anim. Genet.* **2014**, *45*, 723–731. <https://doi.org/10.1111/age.12188>.
41. Marletta, D.; Bordonaro, S.; Guastella, A.M.; Criscione, A.; D'Urso, G. Genetic polymorphism of the calcium sensitive caseins in Sicilian Girgentana and Argentata dell'Etna goat breeds. *Small Rumin. Res.* **2005**, *57*, 133–139. <https://doi.org/10.1016/j.smallrumres.2004.06.019>.
42. Sacchi, P.; Chessa, S.; Budelli, E.; Bolla, P.; Ceriotti, G.; Soglia, D.; Rasero, R.; Cauvin, E.; Caroli, A. Casein haplotype structure in five Italian goat breeds. *J. Dairy Sci.* **2005**, *88*, 1561–1568. [https://doi.org/10.3168/jds.S0022-0302\(05\)72825-3](https://doi.org/10.3168/jds.S0022-0302(05)72825-3).
46. Caroli, A.; Chiatti, F.; Chessa, S.; Rignanesi, D.; Bolla, P.; Pagnacco, G. Focusing on the goat casein complex. *J. Dairy Sci.* **2006**, *89*, 3178–3187. [https://doi.org/10.3168/jds.S0022-0302\(06\)72592-9](https://doi.org/10.3168/jds.S0022-0302(06)72592-9).
49. Frattini, S.; Nicoloso, L.; Coizet, B.; Chessa, S.; Rapetti, L.; Pagnacco, G.; Crepaldi, P. Short communication: The unusual genetic trend of  $\alpha$ S1-casein in Alpine and Saanen breeds. *J. Dairy Sci.* **2014**, *97*, 7975–7979. <https://doi.org/10.3168/jds.2014-7780>.
56. Santillo, A.; Ciliberti, M.G.; D'Angelo, F.; Albenzio, M. The Effect of Alpha s1 Genotype on Some Physiological and Chemical Milk Characteristics in Garganica Goat. *Anim. Front.* **2022**, *3*, 897172. <https://doi.org/10.3389/fanim.2022.897172>.
63. Mastrangelo, S.; Sardina, M.T.; Tolone, M.; Portolano, B. Genetic polymorphism at the CSN1S1 gene in Girgentana dairy goat breed. *Anim. Prod. Sci.* **2013**, *53*, 403–406. <https://doi.org/10.1071/AN12242>.
64. Guastella, A.M.; Criscione, A.; Zuccaro, A.; Tidona, F.; Marietta, D.; Bordonaro, S. Genetic polymorphism of CSN1S1 and CSN2 loci in Rossa Mediterranea goat population. *Ital. J. Anim. Sci.* **2009**, *8*, 101–103. <https://doi.org/10.4081/ijas.2009.s3.101>.
